# Supplementary material for: Highly conductive tissue-like hydrogel interface through template-directed assembly
Source: PubMed Central journal article supplement (PMC10113367; doi:10.1038/s41467-023-37948-1), 2023-04-18
Supplement: 41467_2023_37948_MOESM3_ESM.pdf [file 41467_2023_37948_MOESM3_ESM.pdf]

### **Description of Additional Supplementary Files**

File Name: Supplementary Movie 1

Description: Compression test of T-ECH

File Name: Supplementary Movie 2

Description: Nerve stimulation using T-ECH electrodes.
